# Supplementary material for: Physical Rehabilitation Needs in the BRICS Nations from 1990 to 2017: Cross-National Analyses Using Data from the Global Burden of Disease Study
Source: Int J Environ Res Public Health. 2020 Jun 10;17(11):4139. doi: 10.3390/ijerph17114139 (PMC7312462; doi:10.3390/ijerph17114139)
Supplement: Supplementary file 1 [file ijerph-17-04139-s001.pdf]

## Supplementary Material 1: Total Physical Rehabilitation Needs

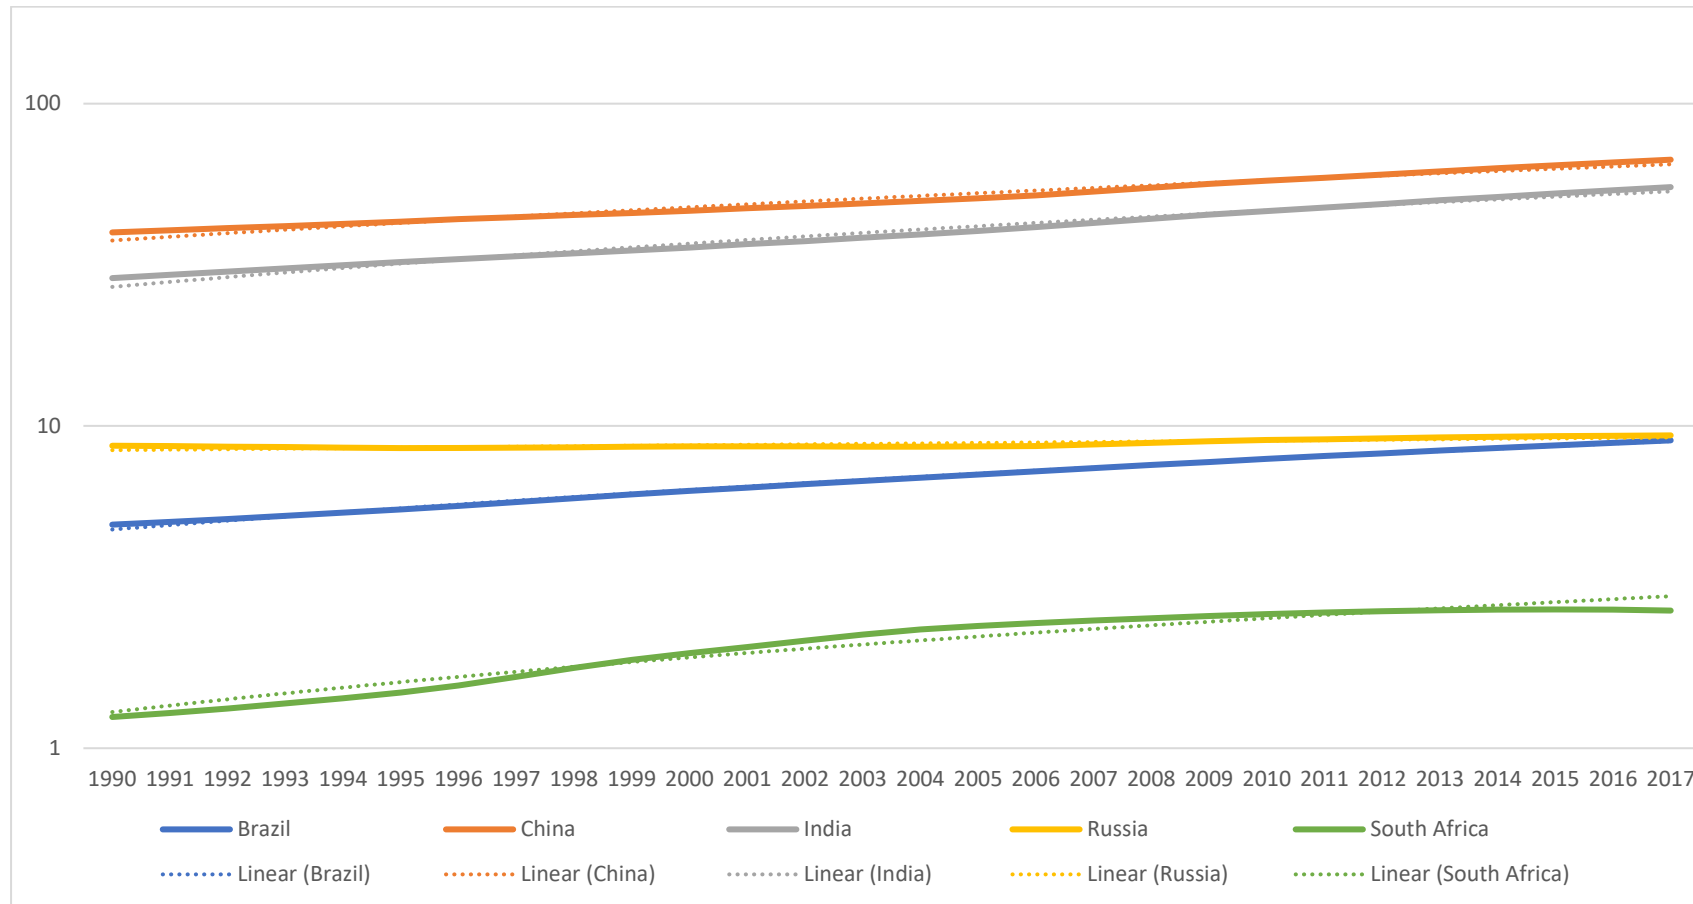

**Supplementary Figure 1:** Years Lived with Disability (YLD Counts) likely benefiting from physical rehabilitation across the five countries analyzed [1990-2017] and their *best fit* regression models (dotted lines). Values in millions. Y axis is in a logarithmic scale.

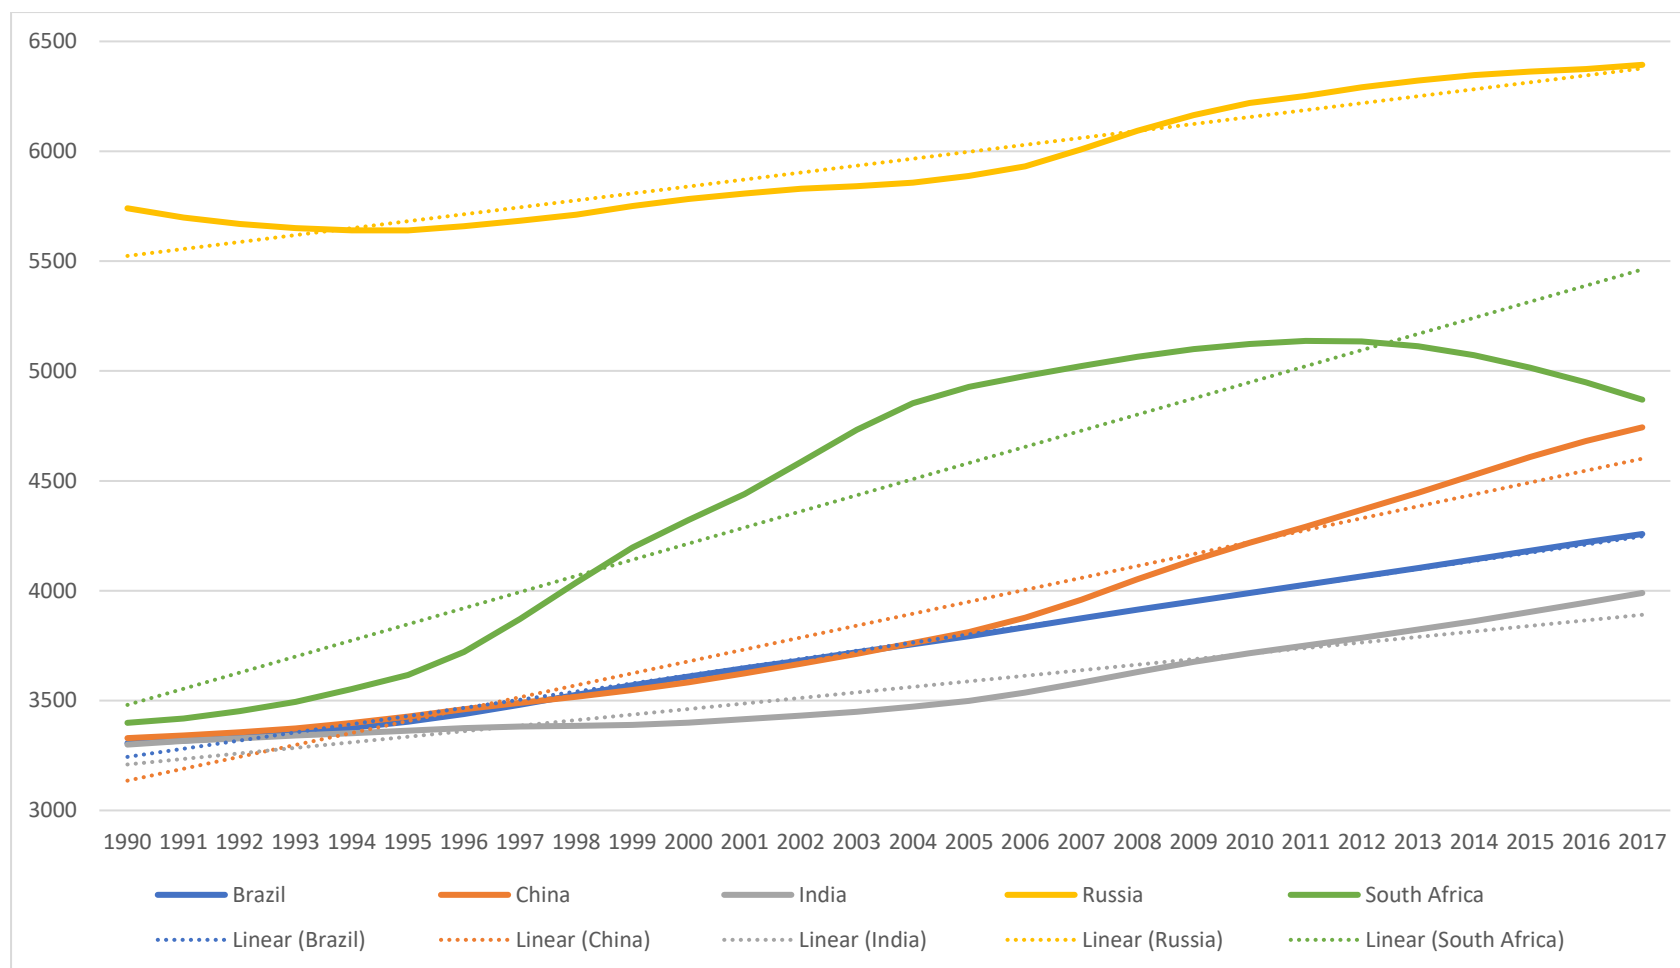

**Supplementary Figure 2:** YLD Rates (i.e. Years Lived with Disability per 100,000 inhabitants) likely benefiting from physical rehabilitation across the five countries analyzed [1990-2017] and their *best fit* regression models (dotted lines).

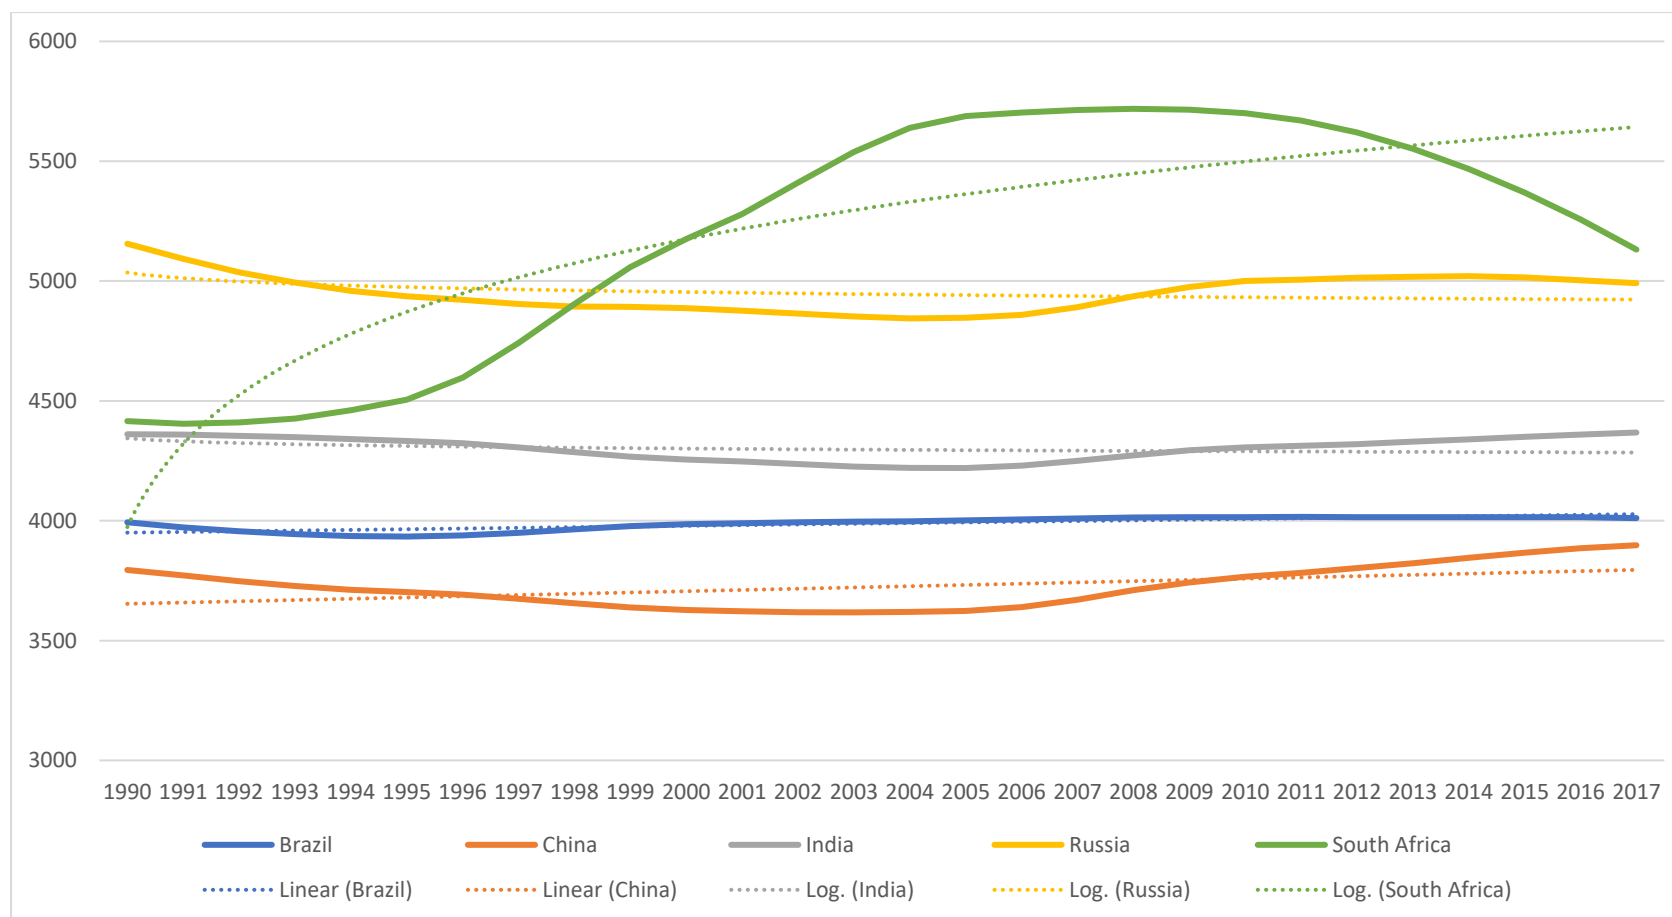

**Supplementary Figure 3:** Age-standardized YLD Rates (i.e. Years Lived with Disability per 100,000 inhabitants adjusted for population ageing) likely benefiting from physical rehabilitation across the five countries analyzed [1990-2017] and their *best fit* regression models (dotted lines). Abbreviation: Log.: Logarithmic.

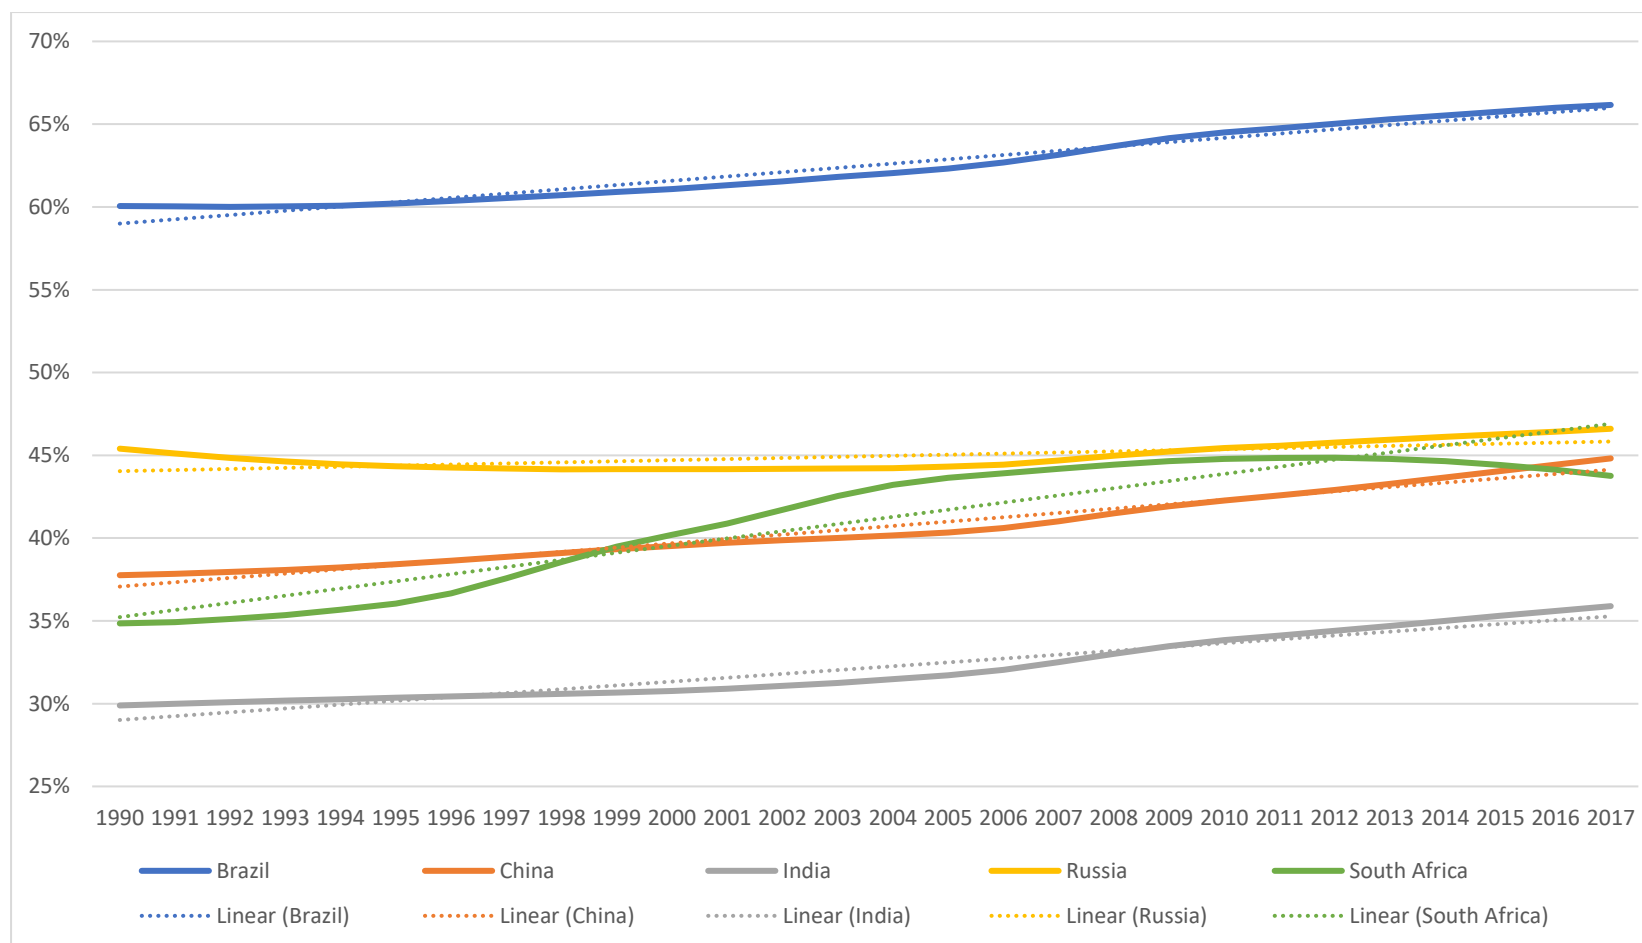

**Supplementary Figure 4:** Percentage of Years Lived with Disability (YLDs) for all conditions likely benefiting from physical rehabilitation among total YLDs, across the five countries analyzed [1990-2017] and their *best fit* regression models (dotted lines).

## Supplementary Material 2: Needs by condition type

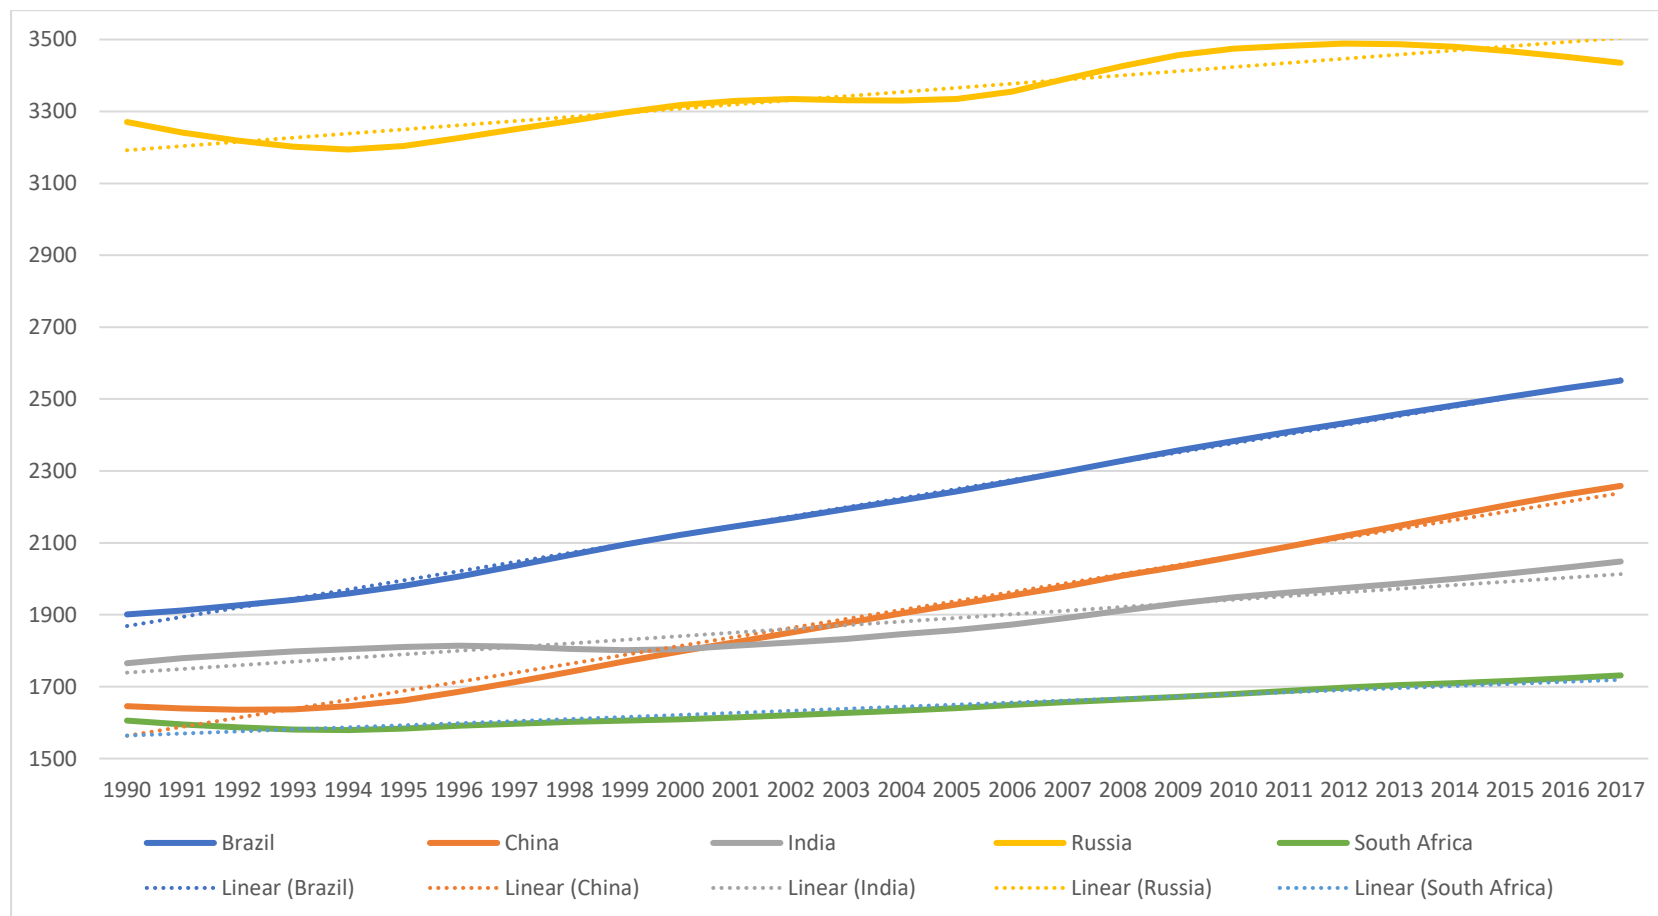

**Supplementary Figure 5:** Rehabilitation-sensitive YLD Rates (i.e. Years Lived with Disability per 100,000 inhabitants) specifically for the group of *musculoskeletal & pain* conditions across the five countries analyzed [1990-2017], and their *best fit* regression models (dotted lines).

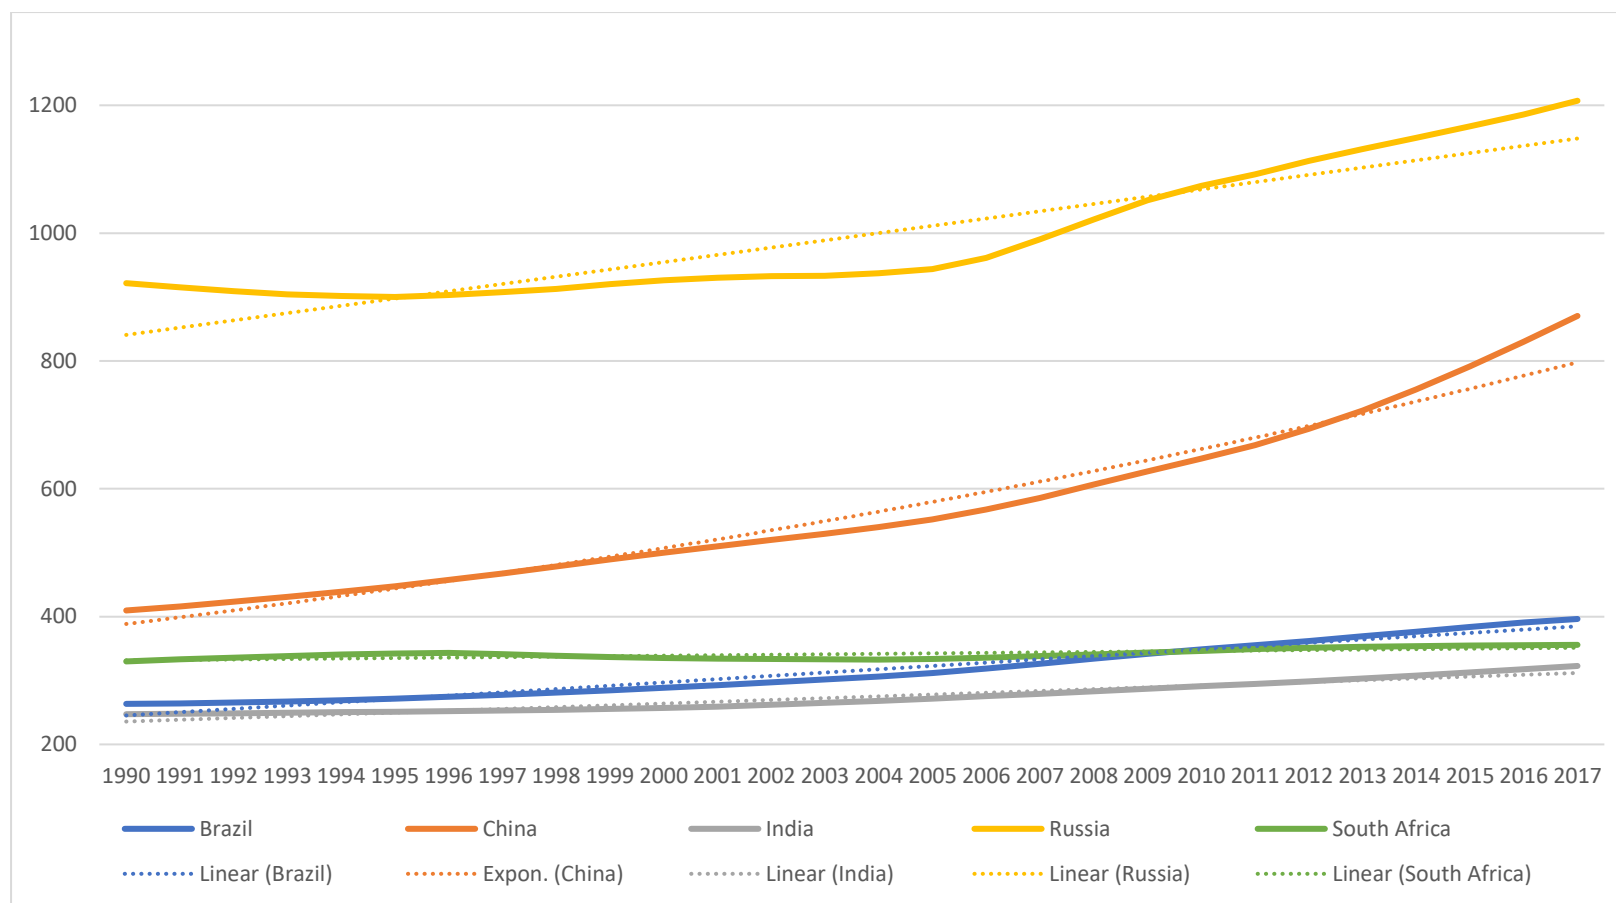

**Supplementary Figure 6:** Rehabilitation-sensitive YLD Rates (i.e. Years Lived with Disability per 100,000 inhabitants) specifically for the group of *neurological* conditions across the five countries analyzed [1990-2017], and their *best fit* regression models (dotted lines). Abbreviation: Expon. = Exponential.

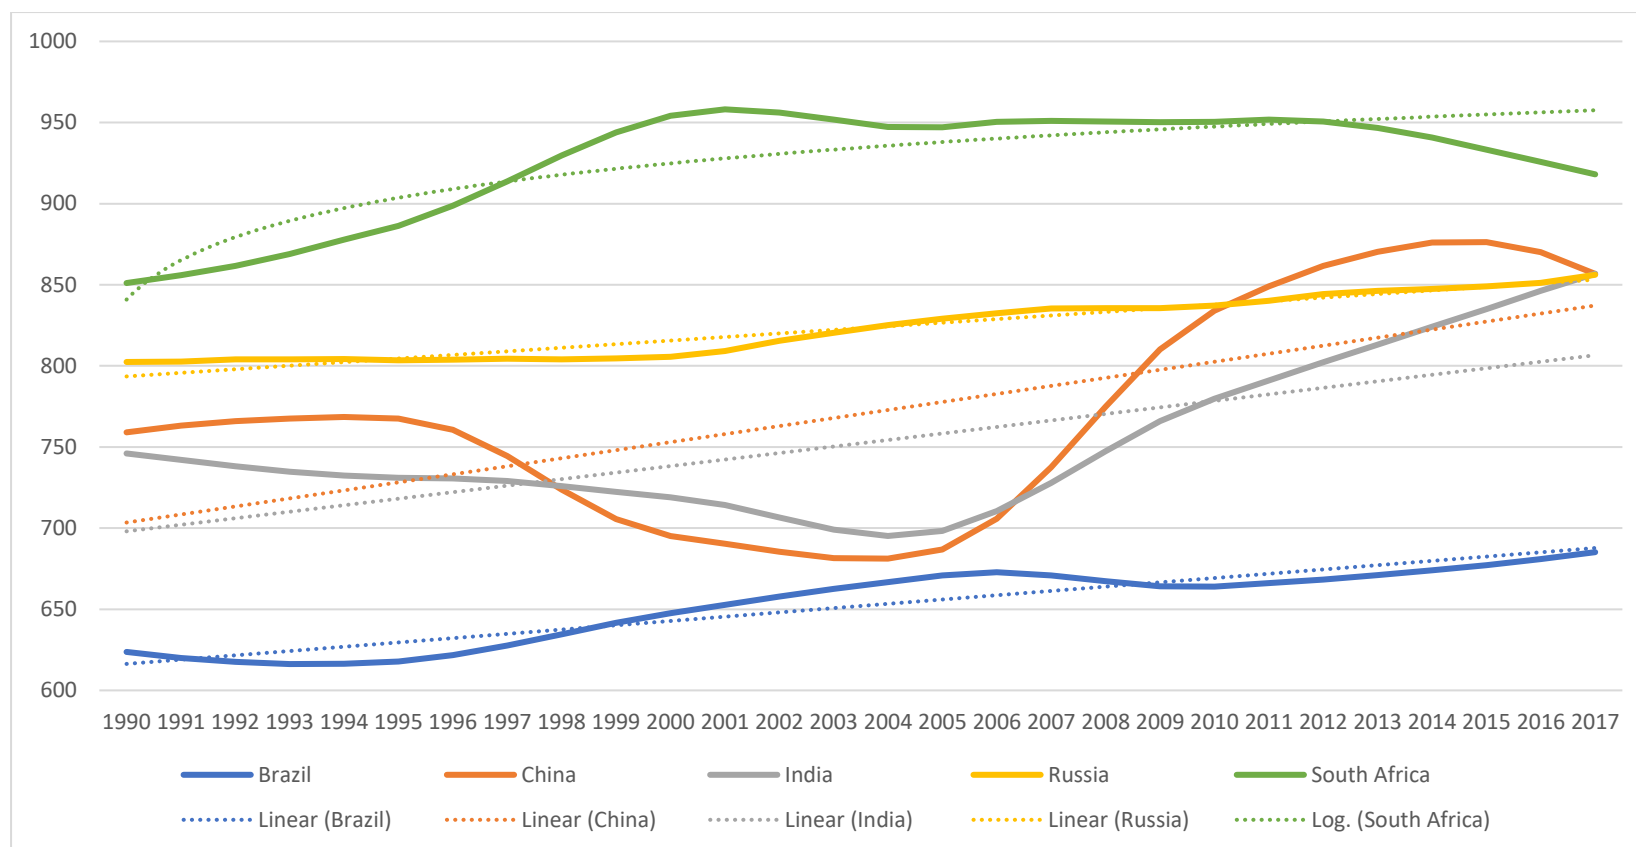

**Supplementary Figure 7:** Rehabilitation-sensitive YLD Rates (i.e. Years Lived with Disability per 100,000 inhabitants) specifically for the group of *cardiothoracic* conditions across the five countries analyzed [1990-2017], and their *best fit* regression models (dotted lines).

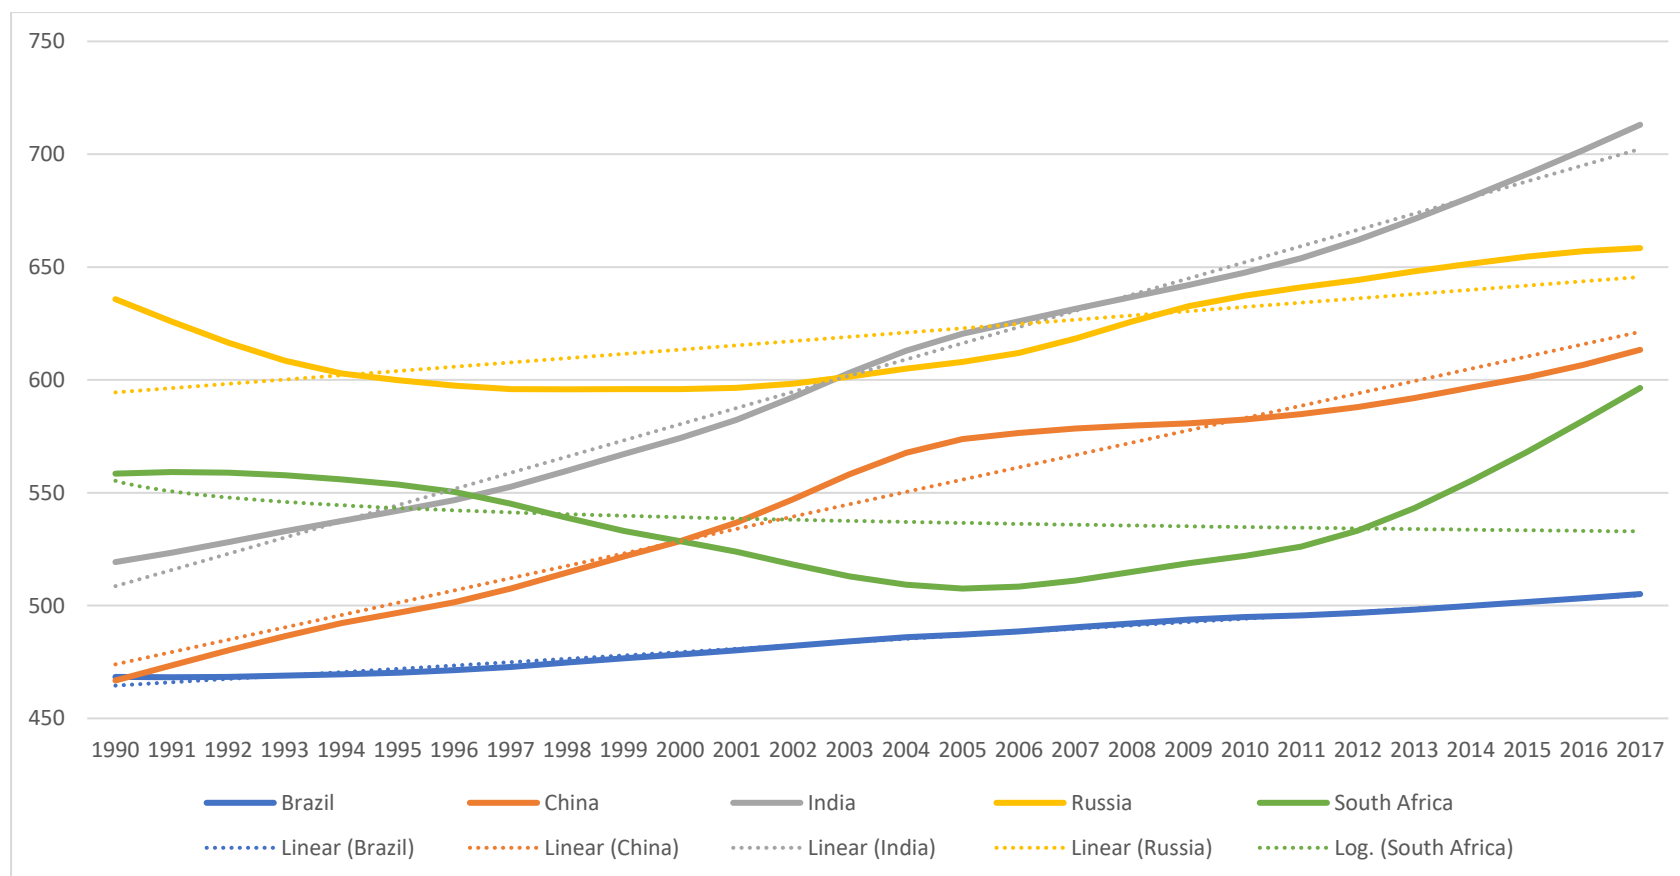

**Supplementary Figure 8:** Rehabilitation-sensitive YLD Rates (i.e. Years Lived with Disability per 100,000 inhabitants) specifically for the group of *pediatric* conditions across the five countries analyzed [1990-2017], and their *best fit* regression models (dotted lines). Abbreviation: Log. = Logarithmic.

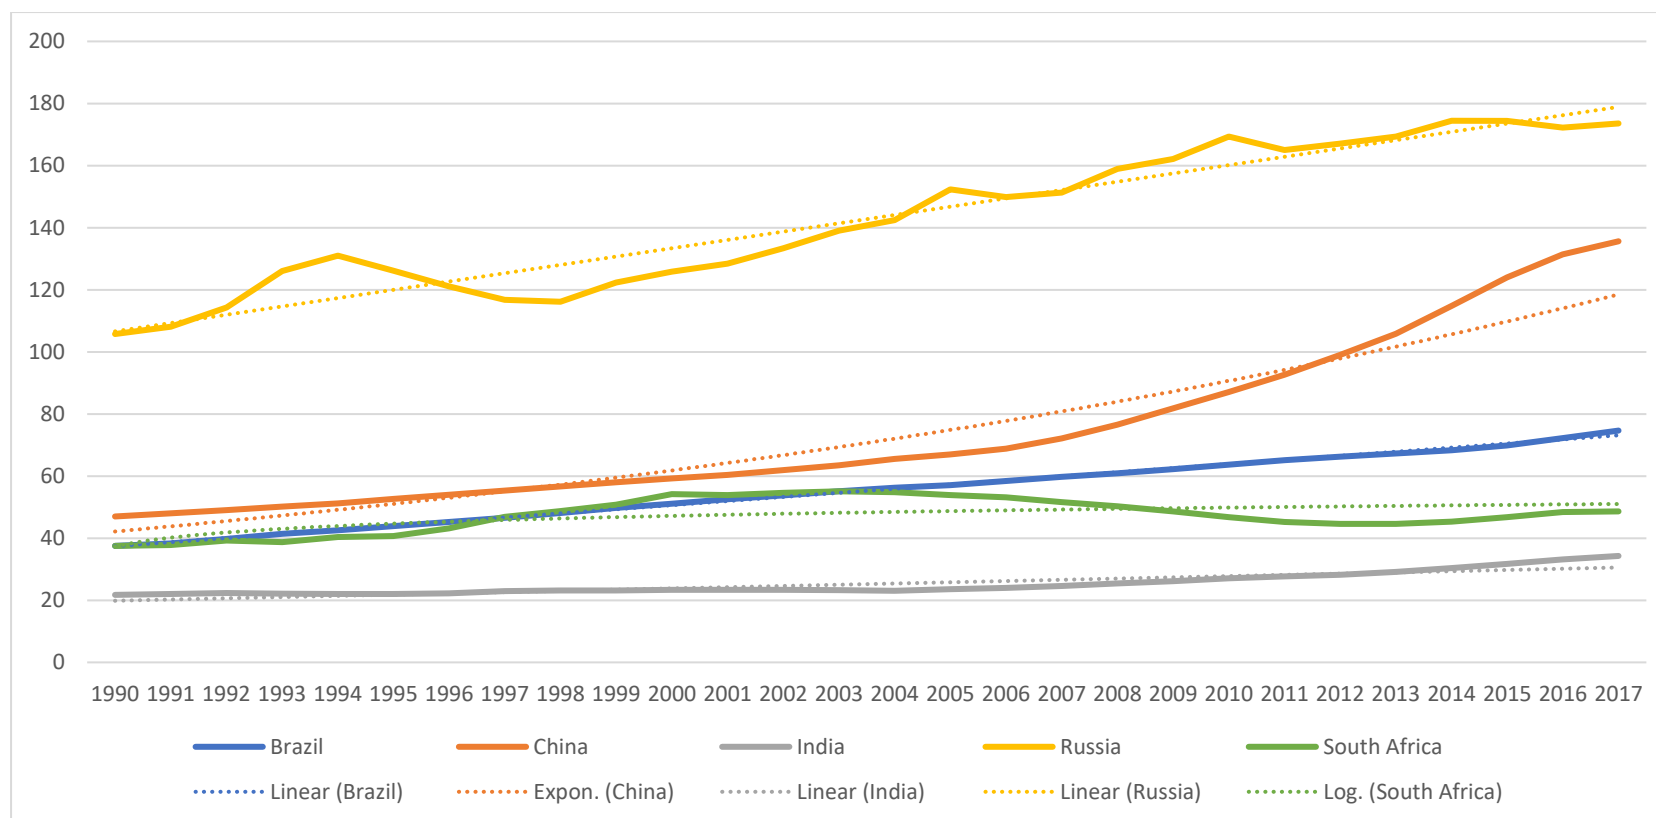

**Supplementary Figure 9:** Rehabilitation-sensitive YLD Rates (i.e. Years Lived with Disability per 100,000 inhabitants) specifically for the group of *neoplastic* conditions across the five countries analyzed [1990-2017], and their *best fit* regression models (dotted lines). Abbreviations: Expon. = Exponential; Log. = Logarithmic.

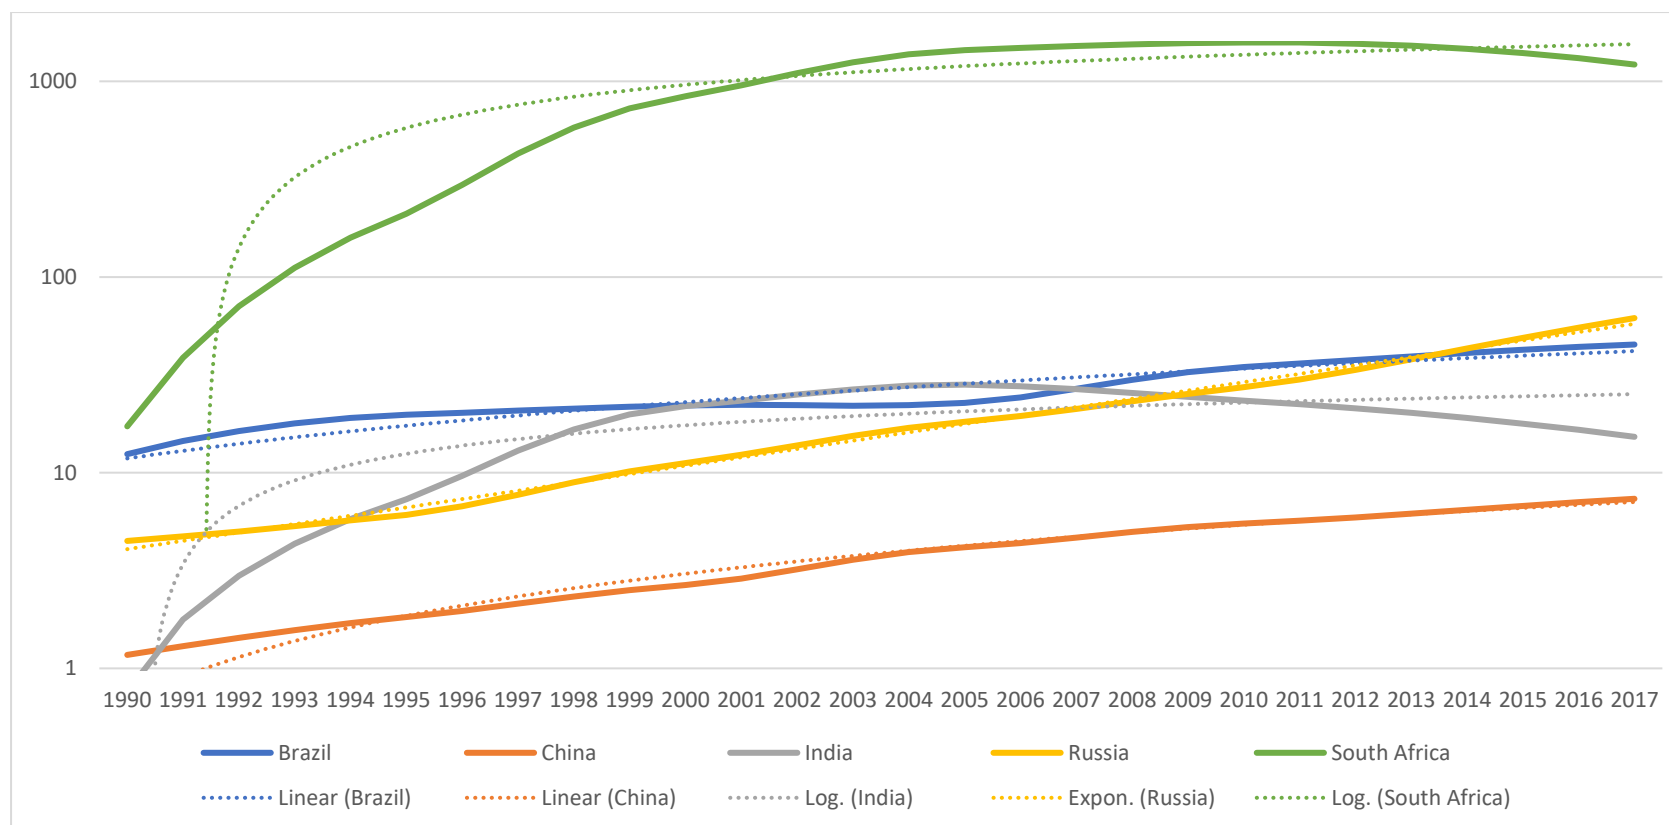

**Supplementary Figure 9:** Rehabilitation-sensitive YLD Rates (i.e. Years Lived with Disability per 100,000 inhabitants) specifically for the group of *HIV-related* conditions across the five countries analyzed [1990-2017], and their *best fit* regression models (dotted lines). The Y axis is at logarithmic scale. Abbreviations: Expon. = Exponential; Log. = Logarithmic.
